# Supplementary material for: Re-aligning the Triple Helix in post-Soviet Armenia
Source: Springer Nature journal article supplement (doi:10.1186/s40604-015-0025-2), 2015-10-15
Supplement: MOESM1 [file 11901868]

# Re-aligning the Triple Helix in post-Soviet Armenia

Annamaria Inzelt

إعادة تنظيم نموذج المراحل الثلاثة في أرمينيا ما بعد الاتحاد السوفيتي  
الكاتب (ة) : Annamaria Inzelt

## ملخص

يتعين في عصر الابتكار على البلدان الأكثر انخفاضاً للدخل أن تحرر نفسها من القيود التي تضعف على نحو خطير العلاقات بين مجالات العلوم والصناعة. مكن تحليل وصفي لهذه الروابط في الاقتصاد السوفياتي - أرمينيا - من القاء الضوء على تطور وضع السياسات التي تعزز مصالح القطاع الخاص مع المجال الأكاديمي خاصة ميدان البحث والتطوير. إلا أن طريقة التفكير لا تزال تعتمد على نموذج "دفع-العلوم" والذي يختلف كثيراً على مفهوم المراحل الثلاثة (صبغة أفقية) . يظهر تحليل تجريبي أن ندرة شركات الابتكار تمثل عائقاً كبيراً للتعاون بين مجالى الصناعة والعلوم . فإذا كان طلب العلم والمعرفة فى القطاع الخاص ضعيفاً فإن نظام الابتكار لا يمكن أن يكون ناجحاً. ابدى عدد قليل جداً من مؤسسات التعليم العالى أو مؤسسات البحوث اهتماماً بإدارة ونقل التكنولوجيا، بما فى ذلك الموارد البشرية اللازمة. تعتبر مشاكل القدرات البشرية والبنية التحتية البالية وشيخوخة اليد العاملة من أكبر المصاعب والعقبات فى المؤسسات العلمية. تمثل الاستقلالية ورقة رابحة فى المؤسسات العلمية إلا أنها لا تتوفر إلا فى نصف الحالات فى أرمينيا. يتعرض الاقتصاد المسير الى خطرين محتملين متصلين بمجال الاستقلالية. يحدث الاول عندما تستأثر الدولة بالاستقلالية القانونية مما يجعل باقى المؤسسات شبه مستقلة. يبرز الخطر الثانى عندما تتردد الدولة فى تقنين استقلالية المؤسسات العلمية. يوجد هذين الخطرين فى الحالة الارمينية.
